# Supplementary material for: Cognitive radio transmission under QoS constraints and interference limitations
Source: Springer Nature journal article supplement (doi:10.1186/1687-1499-2012-301), 2012-09-24

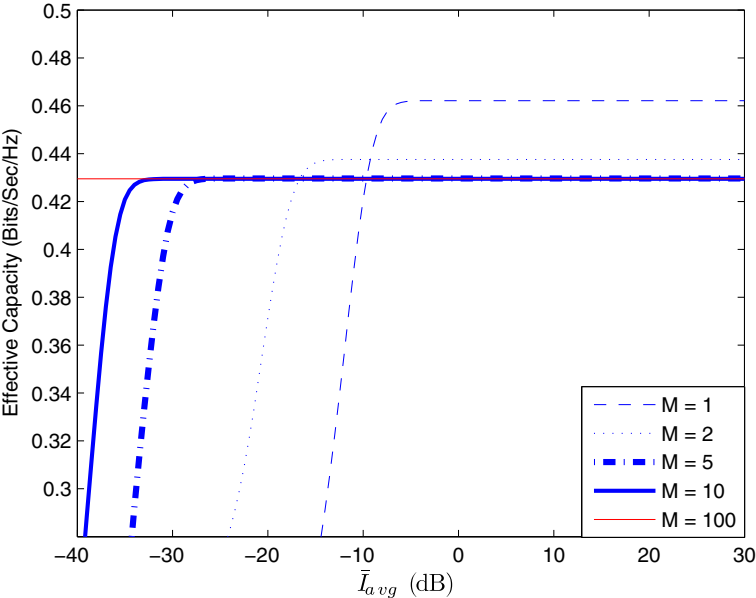

Supplement: 13638_2011_538_MOESM8_ESM.pdf [file 13638_2011_538_MOESM8_ESM.pdf]
